# Supplementary material for: Virion Structure of Black Queen Cell Virus, a Common Honeybee Pathogen
Source: PubMed Central journal article supplement (PMC5331821; doi:10.1128/jvi.02100-16), 2017-02-28
Supplement: JVI.02100-16_zjv999182406s1.pdf [file JVI.02100-16_zjv999182406s1.pdf]

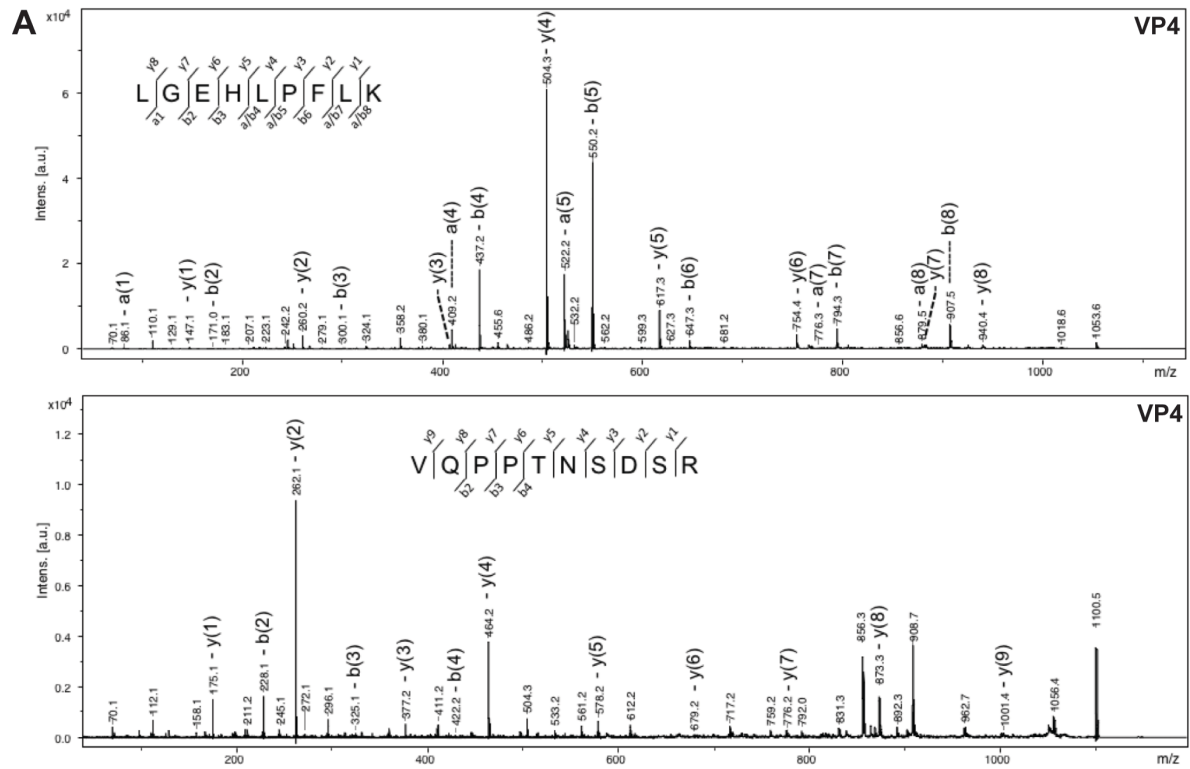

**B** VP4  
 SGLK**VQPPPTN** **SDSR**QRAKES KGKKDYSKTG AAFKQSVSK**L** **GEHLPLFLK**SG ANWVSENILQ PADEIIGPIL SLFGF

**Supplementary fig. 1. Mass spec analysis of proteins from BQCV showing that VP4 subunits are components of BQCV virions.** Bands on SDS gel corresponding to VP4 shown in Fig. 7A were analyzed by Mass spectrometry. (A) Mass spectra of peptides from the putative VP4 sequences. (B) Amino acid sequence of VP4 of BQCV. Amino acids that are parts of the peptides that were detected in the Mass Spec analysis are highlighted in red.
